# Supplementary material for: Research Trends and Hotspots of Retinal Optical Coherence Tomography: A 31-Year Bibliometric Analysis
Source: MDPI journal article supplement (doi:10.3390/jcm11195604), 2022-09-23
Supplement: s1 [file s1]

**Table S1. Cluster 1 of the top 100 keywords.**

| <b>Rank</b> | <b>Keywords</b>              | <b>Counts</b> |
|-------------|------------------------------|---------------|
| 1           | optical coherence tomography | 11305         |
| 2           | eyes                         | 2716          |
| 3           | thickness                    | 2313          |
| 4           | glaucoma                     | 1958          |
| 6           | nerve-fiber layer            | 1765          |
| 8           | OCT                          | 1663          |
| 13          | prevalence                   | 1167          |
| 19          | choroidal thickness          | 1005          |
| 20          | reproducibility              | 1005          |
| 24          | progression                  | 908           |
| 27          | open-angle glaucoma          | 818           |
| 35          | damage                       | 712           |
| 36          | coherence tomography         | 689           |
| 37          | retinal nerve fiber layer    | 672           |
| 38          | age                          | 653           |
| 41          | retinal thickness            | 620           |
| 44          | association                  | 575           |
| 45          | risk-factors                 | 575           |
| 47          | diagnosis                    | 567           |
| 48          | intraocular-pressure         | 555           |
| 50          | axial length                 | 534           |
| 57          | myopia                       | 483           |
| 63          | fiber layer thickness        | 470           |
| 65          | macular thickness            | 465           |
| 66          | children                     | 461           |
| 70          | atrophy                      | 437           |
| 85          | multiple-sclerosis           | 396           |
| 86          | abnormalities                | 390           |
| 87          | thickness measurements       | 371           |
| 94          | head                         | 358           |
| 98          | multiple sclerosis           | 352           |
| 99          | population                   | 351           |

**Table S2. Cluster 2 of the top 100 keywords.**

| <b>Rank</b> | <b>Keywords</b>                  | <b>Counts</b> |
|-------------|----------------------------------|---------------|
| 7           | macular degeneration             | 1691          |
| 9           | retinopathy                      | 1530          |
| 10          | ranibizumab                      | 1446          |
| 12          | choroidal neovascularization     | 1172          |
| 16          | age-related macular degeneration | 1039          |
| 17          | macular edema                    | 1034          |
| 18          | visual-acuity                    | 1020          |
| 22          | endothelial growth-factor        | 933           |
| 23          | bevacizumab                      | 924           |
| 26          | photodynamic therapy             | 822           |
| 29          | therapy                          | 784           |
| 32          | diabetic macular edema           | 742           |
| 33          | central serous chorioretinopathy | 732           |
| 52          | edema                            | 519           |
| 55          | injection                        | 508           |
| 58          | indocyanine green angiography    | 482           |
| 64          | neovascularization               | 467           |
| 67          | management                       | 456           |
| 69          | verteporfin                      | 439           |
| 75          | secondary                        | 424           |
| 80          | uveitis                          | 404           |
| 84          | intravitreal bevacizumab         | 398           |
| 88          | efficacy                         | 369           |
| 91          | cystoid macular edema            | 360           |
| 92          | expression                       | 360           |

**Table S3. Cluster 3 of the top 100 keywords.**

| <b>Rank</b> | <b>Keywords</b>                              | <b>Counts</b> |
|-------------|----------------------------------------------|---------------|
| 15          | degeneration                                 | 1055          |
| 21          | disease                                      | 948           |
| 34          | fundus autofluorescence                      | 731           |
| 42          | in-vivo                                      | 603           |
| 46          | eye                                          | 572           |
| 53          | segmentation                                 | 513           |
| 56          | classification                               | 491           |
| 60          | geographic atrophy                           | 479           |
| 68          | images                                       | 451           |
| 74          | maculopathy                                  | 426           |
| 78          | mutations                                    | 407           |
| 81          | high-speed                                   | 403           |
| 82          | retinal-pigment epithelium                   | 403           |
| 83          | retinitis-pigmentosa                         | 400           |
| 90          | spectral-domain optical coherence tomography | 361           |
| 93          | sensitivity                                  | 359           |
| 95          | microperimetry                               | 358           |
| 96          | model                                        | 357           |
| 100         | resolution                                   | 346           |

**Table S4. Cluster 4 of the top 100 keywords.**

| <b>Rank</b> | <b>Keywords</b>                          | <b>Counts</b> |
|-------------|------------------------------------------|---------------|
| 5           | retina                                   | 1904          |
| 11          | optical coherence tomography angiography | 1175          |
| 25          | fluorescein angiography                  | 848           |
| 30          | angiography                              | 776           |
| 31          | diabetic retinopathy                     | 753           |
| 39          | blood-flow                               | 652           |
| 40          | features                                 | 628           |
| 51          | diabetic-retinopathy                     | 534           |
| 54          | macula                                   | 509           |
| 59          | choroid                                  | 480           |
| 61          | coherence tomography angiography         | 476           |
| 62          | foveal avascular zone                    | 474           |
| 72          | risk                                     | 430           |
| 73          | vessel density                           | 428           |
| 76          | imaging                                  | 422           |
| 79          | oct angiography                          | 405           |
| 89          | choriocapillaris                         | 361           |

**Table S5. Cluster 5 of the top 100 keywords.**

| <b>Rank</b> | <b>Keywords</b>            | <b>Counts</b> |
|-------------|----------------------------|---------------|
| 14          | vitrectomy                 | 1134          |
| 28          | surgery                    | 784           |
| 43          | outcomes                   | 591           |
| 49          | macular hole               | 537           |
| 71          | epiretinal membrane        | 430           |
| 77          | internal limiting membrane | 417           |
| 97          | pathogenesis               | 357           |

**Table S6. Details of clusters.**

| <b>Cluster</b> | <b>Size</b> | <b>Silhouette</b> | <b>Mean (Year)</b> | <b>Label (log-likelihood ratio algorithm)</b> |
|----------------|-------------|-------------------|--------------------|-----------------------------------------------|
| 0              | 297         | 0.889             | 2015               | optical coherence tomography angiography      |
| 1              | 193         | 0.93              | 2005               | ophthalmology                                 |
| 2              | 190         | 0.954             | 1994               | partial coherence interferometry              |
| 3              | 183         | 0.888             | 2006               | bevacizumab                                   |
| 4              | 173         | 0.932             | 2011               | glaucoma                                      |
| 5              | 171         | 0.942             | 2002               | scanning laser polarimetry                    |
| 6              | 135         | 0.971             | 2011               | choroidal thickness                           |
| 7              | 130         | 0.866             | 2003               | retinal thickness                             |
| 8              | 120         | 0.955             | 1998               | macular hole                                  |
| 9              | 115         | 0.956             | 2015               | deep learning                                 |
| 10             | 114         | 0.981             | 2011               | multiple sclerosis                            |
| 11             | 102         | 0.897             | 2009               | epiretinal membrane                           |
| 12             | 101         | 0.943             | 2012               | reticular pseudodrusen                        |
| 13             | 94          | 0.956             | 2017               | choriocapillaris                              |
| 14             | 93          | 0.979             | 2015               | Alzheimer's disease                           |
| 15             | 84          | 0.957             | 2015               | central serous chorioretinopathy              |
| 16             | 75          | 0.976             | 2016               | vessel density                                |
| 17             | 63          | 0.981             | 2012               | adaptive optics                               |
| 18             | 53          | 0.95              | 2008               | retinitis pigmentosa                          |
| 19             | 53          | 0.976             | 2003               | triamcinolone acetonide                       |
| 20             | 52          | 0.952             | 2012               | aflibercept                                   |
| 21             | 50          | 0.976             | 2001               | photodynamic therapy                          |
| 22             | 45          | 0.995             | 2012               | vitreomacular traction                        |
| 23             | 44          | 0.995             | 2014               | diabetic macular edema                        |
| 25             | 9           | 1                 | 2004               | electroretinogram                             |
| 27             | 7           | 1                 | 1992               | resolution                                    |
